# Supplementary material for: Single-crystalline rutile TiO2 nano-flower hierarchical structures for enhanced photocatalytic selective oxidation from amine to imine
Source: Royal Society of Chemistry journal article supplement (doi:10.1039/c5ra23428j), 2015-01-01
Supplement: c5ra23428j1.pdf [file c5ra23428j1.pdf]

## Supporting information for

# Single-crystalline rutile TiO<sub>2</sub> nano-flower hierarchical structures for the enhanced photocatalytic selective oxidation from amine to imine

*Jing Bu,<sup>a</sup> Jun Fang,<sup>\*b</sup> Wan Ru Leow,<sup>a</sup> Kaihong Zheng,<sup>a</sup> Xiaodong Chen<sup>\* a</sup>*

<sup>a</sup>School of Materials Science and Engineering, Nanyang Technological University, 50 Nanyang Avenue, Singapore 639798, Singapore

<sup>b</sup>State Key Laboratory of Materials-Oriented Chemical Engineering, College of Chemical Engineering, Nanjing Tech University, No. 5 Xin Mofan Road, Nanjing 210009 (P.R. China)

\*Corresponding Author. Prof. Dr. Xiaodong Chen E-mail: [chenxd@ntu.edu.sg](mailto:chenxd@ntu.edu.sg)

Prof. Dr. Jun Fang E-mail: [fangjun@njtech.edu.cn](mailto:fangjun@njtech.edu.cn)

## Experimental

**Synthesis of TiO<sub>2</sub> samples.** All the chemicals used in this study were analytical grade and were applied directly without any further purification. In a typical synthesis, 1 ml titanium tetrabutoxide and 1 ml TiCl<sub>4</sub> (1 M in toluene) were added into 10 ml toluene solution which was pre-acidified with 1 ml HCl (37%), then calculated amount of CTAB was added. The mixture was stirred and sealed in a Teflon autoclave and kept at 180 °C in the oven for 2 h for the solvent-thermal reaction. After the cooling down of the autoclave to room temperature, the obtained precipitation was centrifuged and washed with water and ethanol for 3 times, then the resulted powder was dried at 60 °C over night.

**Characterization.** X-ray diffraction (XRD) patterns were obtained on a Shimadzu XRD-6000 X-Ray diffractometer (Cu-K<sub>α</sub> source) with the scanning range from 20° to 80°. Raman spectrum was recorded on a Witec alpha300 SR Raman spectrometer using 488nm laser as the excited source. Diffuse reflectance UV-Vis spectra were acquired on a Lambda 750 UV/Vis/NIR spectrophotometer (Perkin Elmer, USA). Scanning Electron Microscopy (SEM) images were examined on JEOL JSM-7600F. Transmission Electron Microscopy (TEM) images were obtained on JEOL JEM-2010 with 200 kV accelerating voltage. BET and pore size distribution analysis were conducted on a Micromeritics ASAP2020 M<sup>+</sup>C system.

**Photocatalytic testing.** In a typical run, 0.1 mmol benzylamine was dissolved into 5 mL acetonitrile as the solvent, followed by adding 25 mg rutile TiO<sub>2</sub> or P25 catalysts, 0.1 Mpa O<sub>2</sub> was used as the oxidant for the oxidation process. And the reaction was performed under visible light from a Xeon lamp equipped with 420 nm cut-off filter. And the conversion of benzylamine to N-benzylidenebenzylamine was determined by GC analysis using chlorobezene as the internal standard.

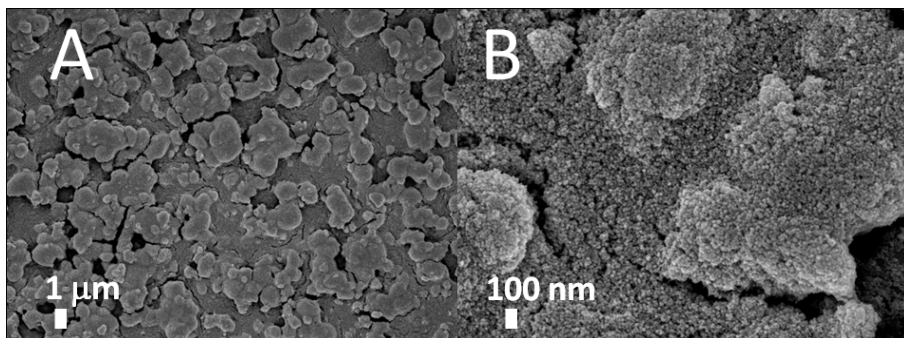

**Fig. S1** SEM images of the solvent-thermal products using ethanol as the solvent to replace toluene while keeping the reaction condition identically.

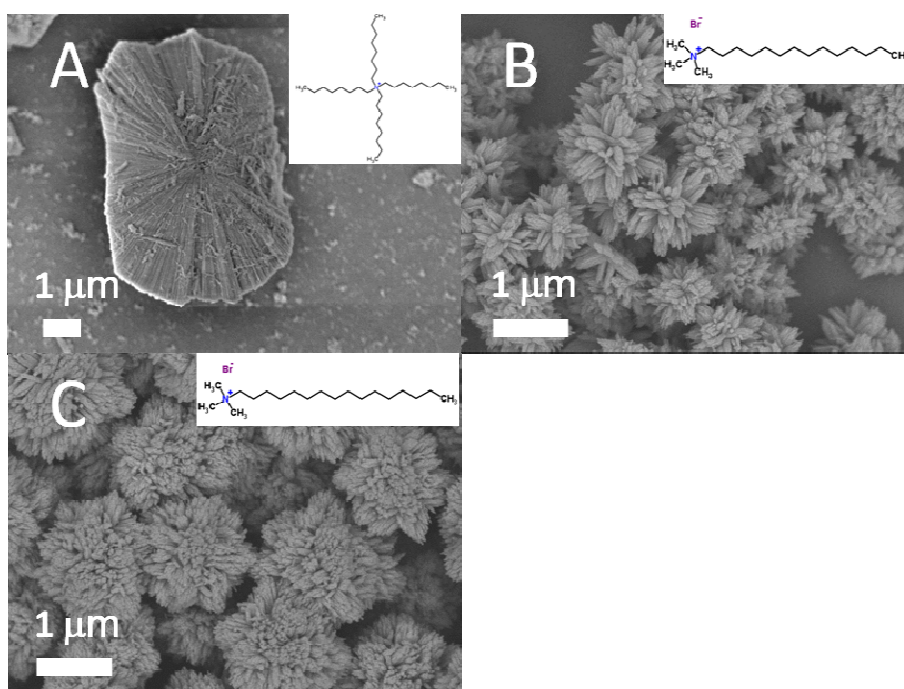

**Fig. S2** SEM images of the solvent-thermal products using (A) Tetraoctylammonium Bromide (TOAB), (B) Tetradecyltrimethylammonium Bromide (TDAB) and (C) Cetyltrimethylammonium Bromide (CTAB) as the surfactants.

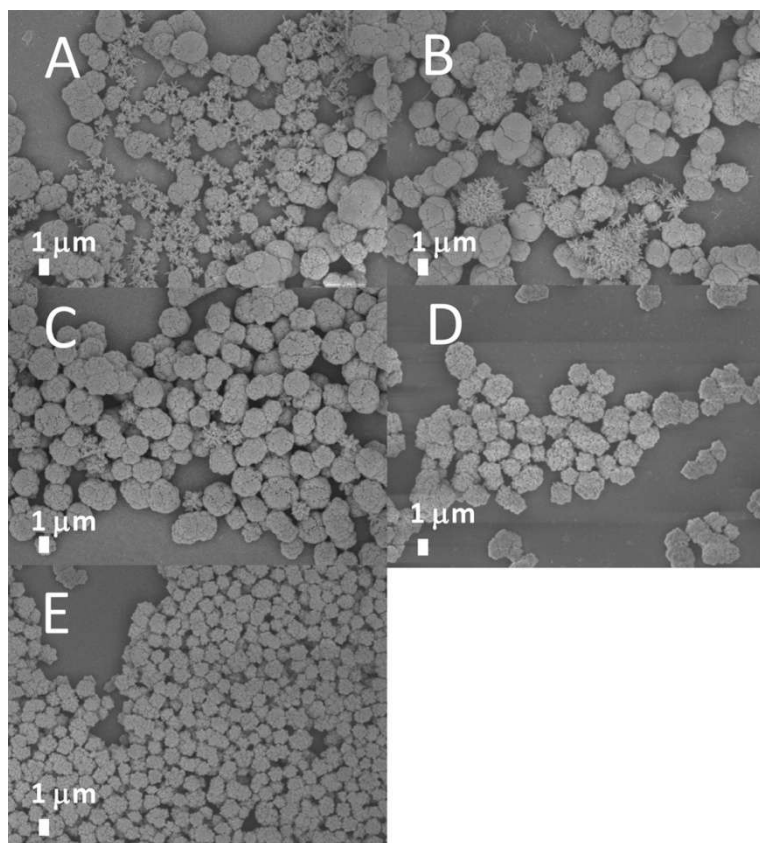

**Fig. S3** SEM images of the TiO<sub>2</sub> samples using different molar ratio between CTAB and Ti precursor. (A) 0.2; (B) 0.4; (C) 0.6; (D) 0.8; (E) 1 (CTAB/Ti precursor)

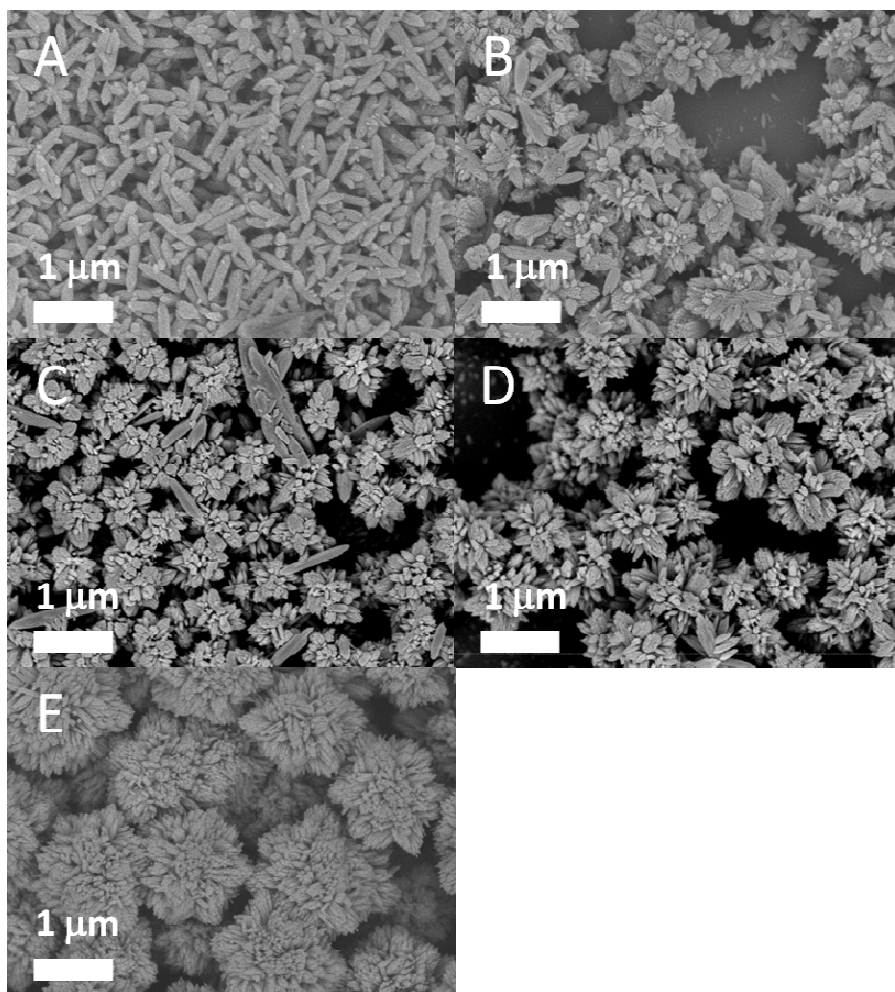

**Fig. S4** SEM images of the TiO<sub>2</sub> samples prepared under different temperatures (A) 80 °C; (B) 100 °C; (C) 120 °C; (D) 160 °C; (E) 180 °C.

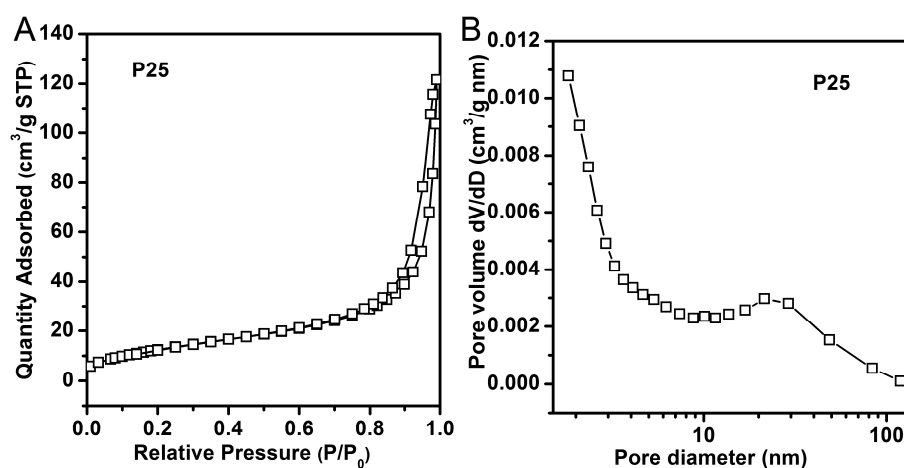

**Fig. S5** (A) The N<sub>2</sub> adsorption-desorption isotherm of P25 TiO<sub>2</sub>; (B) The pore size distributions of P25 TiO<sub>2</sub>.

**Table S1.** Macroproperties of the rutile TiO<sub>2</sub> nano-flower structures and commercial P25.

| <b>Samples</b>                    | <b>BET surface area (m<sup>2</sup>/g)</b> | <b>Pore volume (cm<sup>3</sup>/g)</b> | <b>Average pore size (nm)</b> |
|-----------------------------------|-------------------------------------------|---------------------------------------|-------------------------------|
| <b>TiO<sub>2</sub>-nanoflower</b> | 43.9                                      | 0.098                                 | 7.73                          |
| <b>P25</b>                        | 47.6                                      | 0.19                                  | 14.01                         |
